# Supplementary material for: The Generation of an ocular anti-inflammatory biotherapeutic to enhance wound healing.
Source: Research Square preprint supplement (doi:10.21203/rs.3.rs-4354377/v1), 2024-08-16
Supplement: Supplementary file 1 [file 3e4ee707758e192184a063d9.xlsx]

## Sheet: 2A
strain	2020-07-14			2020-07-09		2020-08-04			2020-08-06		2020-07-03					avg	std dev
as1 1	0.0638117	0.0569594	0.052978	0.024973	0.00636658	0.0999507	0.0679171	0.0924077	0.0890316	0.0865891	0.0389277	0.0368823	0.0377517			0.058042	0.0275387
2.1	0.168498	0.121256		0.146745							0.323655	0.502419	0.376079			0.273109	0.138871
2.2	0.118773			0.186952	0.100985											0.13557	0.0370514
2.3	0.0549205	0.11174	0.0694547	0.187145	0.162044											0.117061	0.0511691
2.4	0.154037			0.187416	0.148669											0.163374	0.0171412
4.2	0.0781523	0.193712	0.0972204	0.262933	0.218876	0.0869905	0.255886	0.0996985	0.092614	0.0916422						0.147772	0.071915
7.2	0.0859018	0.322445	0.0860255	0.174298	0.22868	0.185322	0.210293	0.206965	0.226091	0.238988						0.196501	0.067032
9.1	0.0638144	0.0717455	0.0620994	0.136123		0.30166	0.301548	0.0863504	0.16836	0.09	0.11627	0.101371	0.066855			0.130517	0.0823038
12.2		0.087891	0.108463	0.187413	0.174453	0.223745	0.239982	0.252742	0.291575							0.195783	0.0660933
21.1				0.110742		0.397788	0.260592	0.430298	0.220661	0.273751						0.282305	0.107251
21.2	0.241027	0.10577	0.22956	0.194005	0.235102	0.436848	0.398507		0.250254	0.26764	0.185826	0.329638	0.231894			0.258839	0.0874578
21.3	0.181715	0.220763	0.184186	0.329756	0.235263											0.230337	0.0538408
a	2	4	7	9	12	21			a	2	4	7	9	12	21
0.063812	0.168498	0.078152	0.085902	0.0638144	0.087891	0.241027			0.0579163	0.114097	0.123028	0.164791	0.0658864	0.098177	0.193837
0.056959	0.118773	0.193712	0.322445	0.0717455	0.108463	0.10577			0.01567	0.159994	0.240904	0.201489	0.136123	0.180933	0.220974
0.052978	0.0549205	0.09722	0.086026	0.0620994		0.22956
	0.154037					0.181715			0.0867585		0.147525	0.20086	0.229853	0.238823	0.384807
	0.121256					0.220763			0.0878103		0.0921281	0.232539	0.12918	0.291575	0.253077
	0.11174					0.184186			0.0378539	0.400718			0.0948322		0.249119
	0.0694547
0.024973	0.146745	0.262933	0.174298	0.136123	0.187413	0.329756
0.006367	0.186952	0.218876	0.22868		0.174453	0.235263
	0.187145					0.194005
	0.187416					0.235102
	0.100985					0.110742
	0.162044
	0.148669
0.0999507		0.0869905	0.185322	0.30166	0.223745	0.397788
0.0679171		0.255886	0.210293	0.301548	0.239982	0.260592
0.0924077		0.0996985	0.206965	0.0863504	0.252742	0.430298
						0.436848
						0.398507
0.0890316		0.092614	0.226091	0.16836	0.291575	0.220661
0.0865891		0.0916422	0.238988	0.09		0.273751
						0.250254
						0.26764
0.0389277	0.323655			0.11627		0.185826
0.0368823	0.502419			0.101371		0.329638
0.0377517	0.376079			0.066855		0.231894

## Sheet: 3A
	AS1		mIL10.4		mIL10.13		mIL10.14
2024-08-30	21.4757	43.7135	490.856	450.161	111.38	123.679	103.474	101.051
2024-09-20	70.2346	77.422	763.124	843.129	97.6843	130.985	355.677	566.276
2024-09-28	11.1627	16.7533	765.863	689.762	212.498	135.801	330.7	182.044

## Sheet: 3B
raw data								norm to blank
+Stim	Blank	AS1	mIL10.4	mIl10.13	mIL10.14		Blank Average			AS1	mIL10.4	mIl10.13	mIL10.14
34.22	32.13	25.43	2.37	9.27	9.24		28.3267			0.897635	0.0836569	0.327215	0.326156
34.34	20.88	38	2.12	13.52	12.51					1.34133	0.0748323	0.477233	0.441581
	31.97	26.32	1.87	12.3	10.21					0.92905	0.0660078	0.434169	0.360395
63.64	54.9	55.17	35.4	23.01	26.53		55.6			0.992266	0.636691	0.413849	0.477158
65.22	56.3	36.72	28.41	21.18	37.89					0.660432	0.510971	0.380935	0.681475
13.59	8.67	6.63	0.64	3.54	6.46		8.40667			0.788347	0.0760999	0.420927	0.768133
12.62	8.55	8.32	1.3	4.91	6.96					0.989298	0.154578	0.583829	0.827586
14.15	8	6.82	0.55	3.12	6.4					0.810939	0.0653983	0.370987	0.760999

## Sheet: 3C&D
	INF-y	Blank	AS1	mIL10.4	mIl10.13	mIL10.14			blank norm
	2024-10-08	889.103	892.561	720.569	893.261	711.193				1.00389	0.810445	1.00468	0.799899
	2024-10-28	559.317	654.354	313.899	651.978	541.367				1.16992	0.561217	1.16567	0.967906
	2024-02-28	855.327	922.485	517.631	210.074	379.85				1.07852	0.605186	0.245607	0.444099
	2024-12-06	24.6489	43.3691	8.23021	14.8715	23.0662				1.75948	0.333898	0.603334	0.935792
	2024-01-13	78.3387	146.17	37.0855	65.2203	45.5512				1.86587	0.473399	0.832543	0.581465
	IL-17	Blank	AS1	mIL10.4	mIl10.13	mIL10.14			blank norm
	2024-10-08	186.768	200.302	111.028	161.816	181.774				1.07246	0.59447	0.8664	0.973259
	2024-10-28	28.2114	23.7094	12.84	29.183	53.7119				0.840418	0.455136	1.03444	1.90391
	2024-02-28	72.9428	60.4297	45.2637	45.1695	79.0177				0.828453	0.620537	0.619246	1.08328
	2024-12-06	169.714	135.216	78.4863	82.8189	45.0863				0.796732	0.462462	0.487991	0.265661
	2024-01-13	75.6902	31.459	92.2619	24.0065	91.6328				0.415629	1.21894	0.317168	1.21063

## Sheet: 4A
	mIL10.4			mIL10.13			mIL10.14
	10-1-21	11-7-21	11-12-21	10-1-21	11-7-21	11-12-21	10-1-21	11-7-21	11-12-21
Mutant	389	278	191	62	22	13	478	323	84
AS1	353	306	197	346	37	131	327	278	67
total	742	584	388	408	59	144	805	601	151
ratio	0.524259	0.476027	0.492268	0.151961	0.372881	0.0902778	0.593789	0.537438	0.556291

## Sheet: 4B
AS1	mIL10.4	mIL10.14
316	14	604
274	288	129
341	260	345
298	205	319
187	11	47
108	30	183
1240	40	231
740	296	40
116	470	140
1280	30	50
210	114	65
56	804	574
140	370	415
30	93	332

## Sheet: 5B
	2024-06-08						2024-07-05						2024-07-11
	T10	PBS	AS1	4	14		T10	PBS	AS1	4	14		T10	PBS	AS1	4	14
	np	0.915037	0.872193	0.759324	0.484886		L	0.941516	0.880354	0.711133	0.754294		L	0.819382	0.996901	#DIV/0!	0.733394
	r	0.897951	0.841309	0.786784	0.581493		NP	0.502464	0.655945	0.909237	#DIV/0!		NP	0.971576	0.943198	0.605682	0.765471
	l	0.975614	0.847007	0.730465	0.546841		R	0.896425	0.771116	0.794406	0.602288		R	0.966318	0.714657	0.713822	0.913386
	rl	0.906994	0.987502	0.686906	0.692889		RL	0.736138	#DIV/0!	0.754771	0.822526		RL		0.792538	0.712102	0.79335
	rr	0.799609	0.730347	0.577682	#DIV/0!		RR	0.959233	0.943865	0.672861	0.591593		RR	0.988576	0.823981	0.362267	0.614263
	T13	PBS	AS1	4	14		T13	PBS	AS1	4	14		T13	PBS	AS1	4	14
	np	0.859006	0.759494	0.769435	0.465936		L	0.815403	0.858339	0.471744	0.71856		L	0.828497	0.999114	#DIV/0!	0.550273
	r	0.681932	0.666667	0.734469	0.609978		NP	0.57737	0.565767	0.495996	#DIV/0!		NP	0.823275	1.11381	0.596364	1.00179
	l	0.826824	0.644418	0.551991	0.434704		R	0.85035	0.667421	0.529471	0.535389		R	0.731907	0.850649	0.704777	0.666189
	rl	0.694096	0.710437	0.697381	0.563063		RL	0.717734	#DIV/0!	0.513836	0.477133		RL		0.774826	0.633209	0.750404
	rr	0.747554	0.682798	0.527509	#DIV/0!		RR	0.813637	0.754591	0.533592	0.561739		RR	0.71089	0.795111	0.497121	0.48278
	T16	PBS	AS1	4	14		T16	PBS	AS1	4	14		T16	PBS	AS1	4	14
	np	0.704971	0.573704	0.540196	0.357557		L	0.664982	0.794209	0.345865	0.660388		L	0.696429	1.01904	#DIV/0!	0.288672
	r	0.809285	0.507771	0.599036	0.494354		NP	0.387542	0.555619	0.461025	#DIV/0!		NP	0.919464	1.12723	0.476591	0.758744
	l	0.823585	0.599697	0.545911	0.288867		R	0.779396	0.561463	0.592208	0.346131		R	0.753528	0.680519	0.513683	0.446194
	rl	0.635967	0.443272	0.600194	0.412806		RL	0.407744	#DIV/0!	0.404819	0.372014		RL		0.847371	0.41677	0.511891
	rr	0.55225	0.36623	0.377336	#DIV/0!		RR	0.531424	0.94929	0.432714	0.39957		RR	0.73853	0.554831	0.556466	0.318071
	T13	PBS	AS1	4	14		T19	PBS	AS1	4	14		T19	PBS	AS1	4	14
	np	0.570497	0.378318	0.535886	0.200157		L	0.582671	0.824599	0.21659	0.388643		L	0.481399	0.609697	#DIV/0!	0.429481
	r	0.681932	0.257669	0.420065	0.371144		NP	0.42874	0.508137	0.226909	#DIV/0!		NP	0.626571	0.763152	0.463636	0.593722
	l	0.7731	0.371217	0.411067	0.0948847		R	0.568559	0.397436	0.422777	0.346131		R	0.816568	0.566048	0.307978	0.248867
	rl	0.451226	0.456906	0.360233	0.314833		RL	0.314054	#DIV/0!	0.309637	0.121502		RL		0.668739	0.286039	0.285154
	rr	0.519178	0.216399	0.291003	#DIV/0!		RR	0.358651	0.811144	0.295487	0.188202		RR	0.747006	0.365774	0.331488	0.307739

## Sheet: 5C
2023-03-24
t0	PBS (-)	PBS CD210	AS1 WT	AS1 CD210	mIL10.4	mIL10.4 CD210	mIL10.14	mIL10.14 CD210		t19	PBS (-)	PBS CD210	AS1 WT	AS1 CD210	mIL10.4	mIL10.4 CD210	mIL10.14	mIL10.14 CD210		% Wound Remaining	PBS (-)	PBS CD210	AS1 WT	AS1 CD210	mIL10.4	mIL10.4 CD210	mIL10.14	mIL10.14 CD210
np	40136	40505	34897	40533	29050	34509	31216	24599		np	17645	20297	12448	29976	5356	13997	6298	37612		np	0.43963	0.501099	0.356707	0.739546	0.184372	0.405604	0.201756	1.52901
R	36165	35208	35786	30855	35468	29454	41176	33835		R	13581	13440	17504	11717	8814	7946	8587	8874		R	0.375529	0.381731	0.48913	0.379744	0.248506	0.269777	0.208544	0.262273
L	42596	32349	42153	34030	33139	23909	33105	33457		L	22368	17627	22227	17041	10993	12287	10566	28189		L	0.52512	0.544901	0.527293	0.500764	0.331724	0.513907	0.319166	0.842544
rl	36019	38568	39405	38889	31384	28439	37444	29268		rl	19326	11566	15809	19848	0	10340	10509	20027		rl	0.53655	0.299886	0.401193	0.510376	0	0.363585	0.280659	0.684263
rr		39908	33887	39558	32654	30472	35688	27894		rr		21480	14713	9247	2095	8593	15433	9693		rr		0.538238	0.434178	0.233758	0.0641575	0.281997	0.432442	0.347494
2023-04-19
t0	PBS (-)	PBS CD210	AS1 WT	AS1 CD210	mIL10.4	mIL10.4 CD210	mIL10.14	mIL10.14 CD210		t19	PBS (-)	PBS CD210	AS1 WT	AS1 CD210	mIL10.4	mIL10.4 CD210	mIL10.14	mIL10.14 CD210		% Wound Remaining	PBS (-)	PBS CD210	AS1 WT	AS1 CD210	mIL10.4	mIL10.4 CD210	mIL10.14	mIL10.14 CD210
np	39100	36828	43570	41244	37575	30706	34297	30780		np	22155	15623	35601	20480	22399	9256	0	17846		np	0.566624	0.424215	0.817099	0.496557	0.596114	0.301439	0	0.579792
R	41878	37317	39131	38468	37239	35070	32470	31717		R	16128	12883	30624	20498	11365	16085	1609	13823		R	0.385119	0.345231	0.782602	0.532858	0.305191	0.458654	0.0495534	0.435823
L	45262	43217	42294	35375	40444	36837	41617	31770		L	25319	24301	20799	12227	16134	26534	8341	21986		L	0.559388	0.562302	0.491772	0.34564	0.398922	0.720308	0.200423	0.692037
rl	43726	41582	35384	42240	41331	38180	38626	36334		rl	15729	20148	14162	14930	19044	28814	11365	11339		rl	0.359717	0.484537	0.400237	0.353456	0.460768	0.754688	0.294232	0.312077
rr	41307	39883	41178	37448	39217	38696	39825	40157		rr		33690	24024	8725	13787	32977	12939	24758		rr		0.844721	0.583418	0.23299	0.351557	0.852207	0.324896	0.61653
2023-05-17
t0	PBS (-)	PBS CD210	AS1 WT	AS1 CD210	mIL10.4	mIL10.4 CD210	mIL10.14	mIL10.14 CD210		t19	PBS (-)	PBS CD210	AS1 WT	AS1 CD210	mIL10.4	mIL10.4 CD210	mIL10.14	mIL10.14 CD210		% Wound Remaining	PBS (-)	PBS CD210	AS1 WT	AS1 CD210	mIL10.4	mIL10.4 CD210	mIL10.14	mIL10.14 CD210
np	39016	38545	40496	35952	43555	40168	47500	42659		np	18067	44888	35181	28756	38404	17617	16739	21375		np	0.463066	1.16456	0.868752	0.799844	0.881736	0.438583	0.3524	0.501067
R	41629	39141	32683	36909	41351	35314	45193	44550		R	22831	15582	34839	29741	9522	18178	6831	10267		R	0.54844	0.398099	1.06597	0.805793	0.230273	0.514753	0.151152	0.23046
L	46036	37737	37733	41235	42366	40779	49178	44478		L	32339	23316	30838	27650	36193	34218	18504	32099		L	0.702472	0.617855	0.817269	0.670547	0.854294	0.839108	0.376266	0.721683
rl	37851	45416	42305	49652	40894	34430		40588		rl	17447	28562	27370	33117	11161	17750		16156		rl	0.460939	0.628897	0.646968	0.666982	0.272925	0.515539		0.398049
rr	43879	43918	42246	38213	44383	34897	44914	41441		rr	19873	31898	23454	29809	10650	12328	15191	25059		rr	0.452905	0.726308	0.555177	0.780075	0.239957	0.353268	0.338224	0.604691
